# Supplementary material for: Divergent Effects of G2019S and R1441C LRRK2 Mutations on LRRK2 and Rab10 Phosphorylations in Mouse Tissues
Source: MDPI journal article supplement (doi:10.3390/cells9112344), 2020-10-22
Supplement: s1 [file s1]

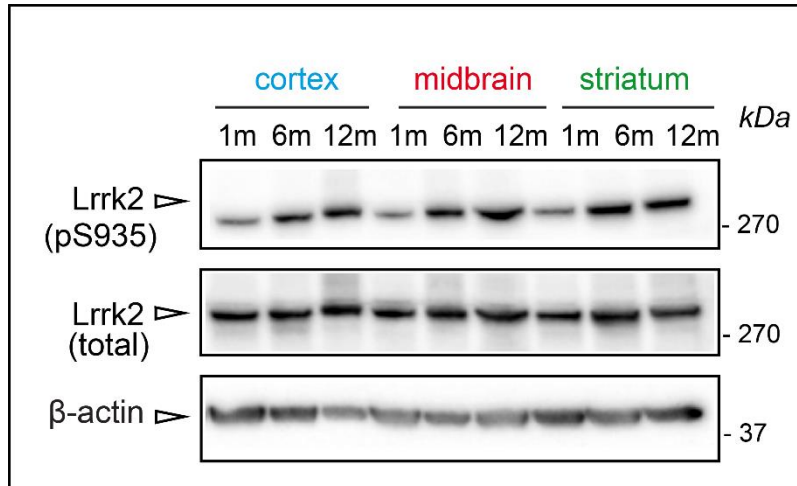

**Figure S1.** Total LRRK2 steady-state levels in mBAC-G2019S PD-relevant brain areas. Representative Western Blot showing Lrrk2 steady state levels in midbrain, striatum and cortex at 1, 6 and 12-month-old mice.

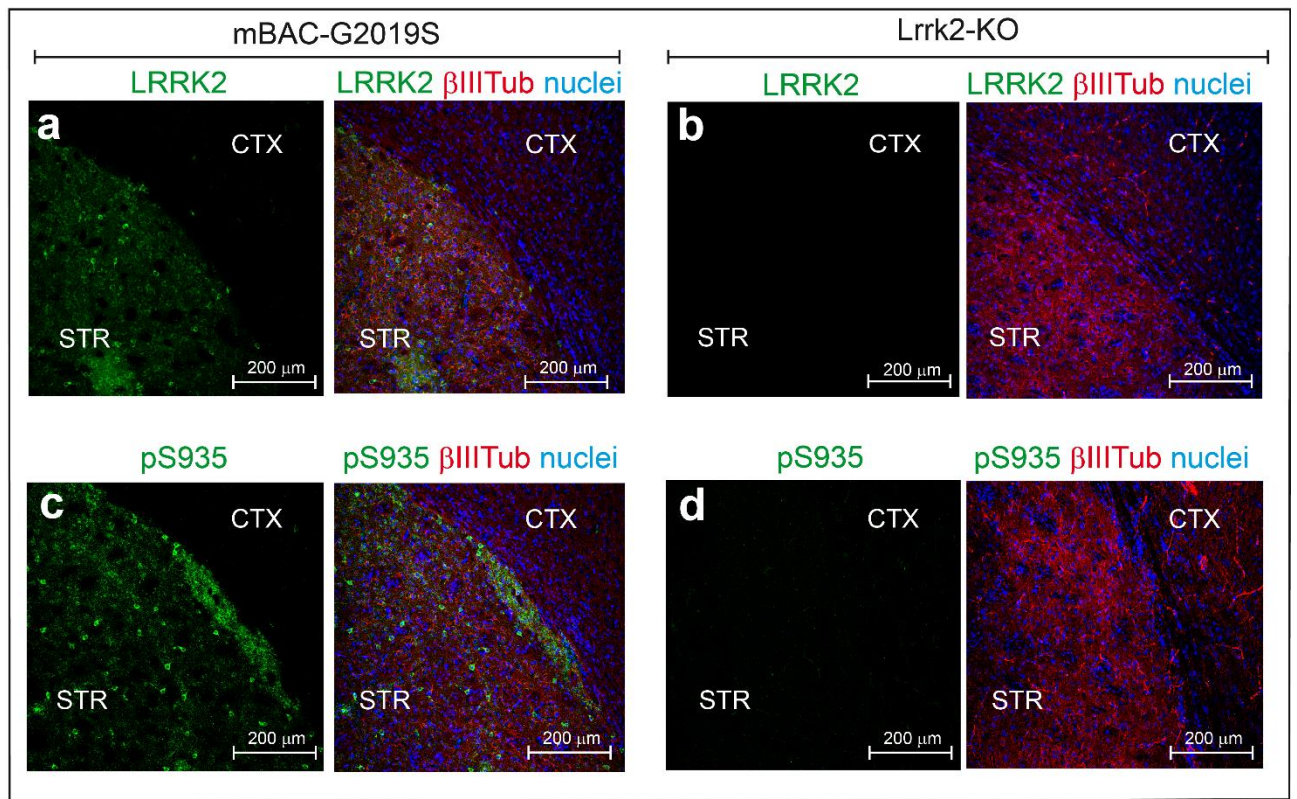

**Figure S2.** Immunofluorescent staining of brain slices from hemizygous transgenic mice overexpressing murine BAC-Lrrk2-G2019S and Lrrk2-KO mice. (a,b) Representative staining of brain slices from BAC-Lrrk2-G2019S mice or (b,d) Lrrk2-KO mice with MJFF2(c41-2) and UDD210(12) antibodies showing the specificity of the staining.

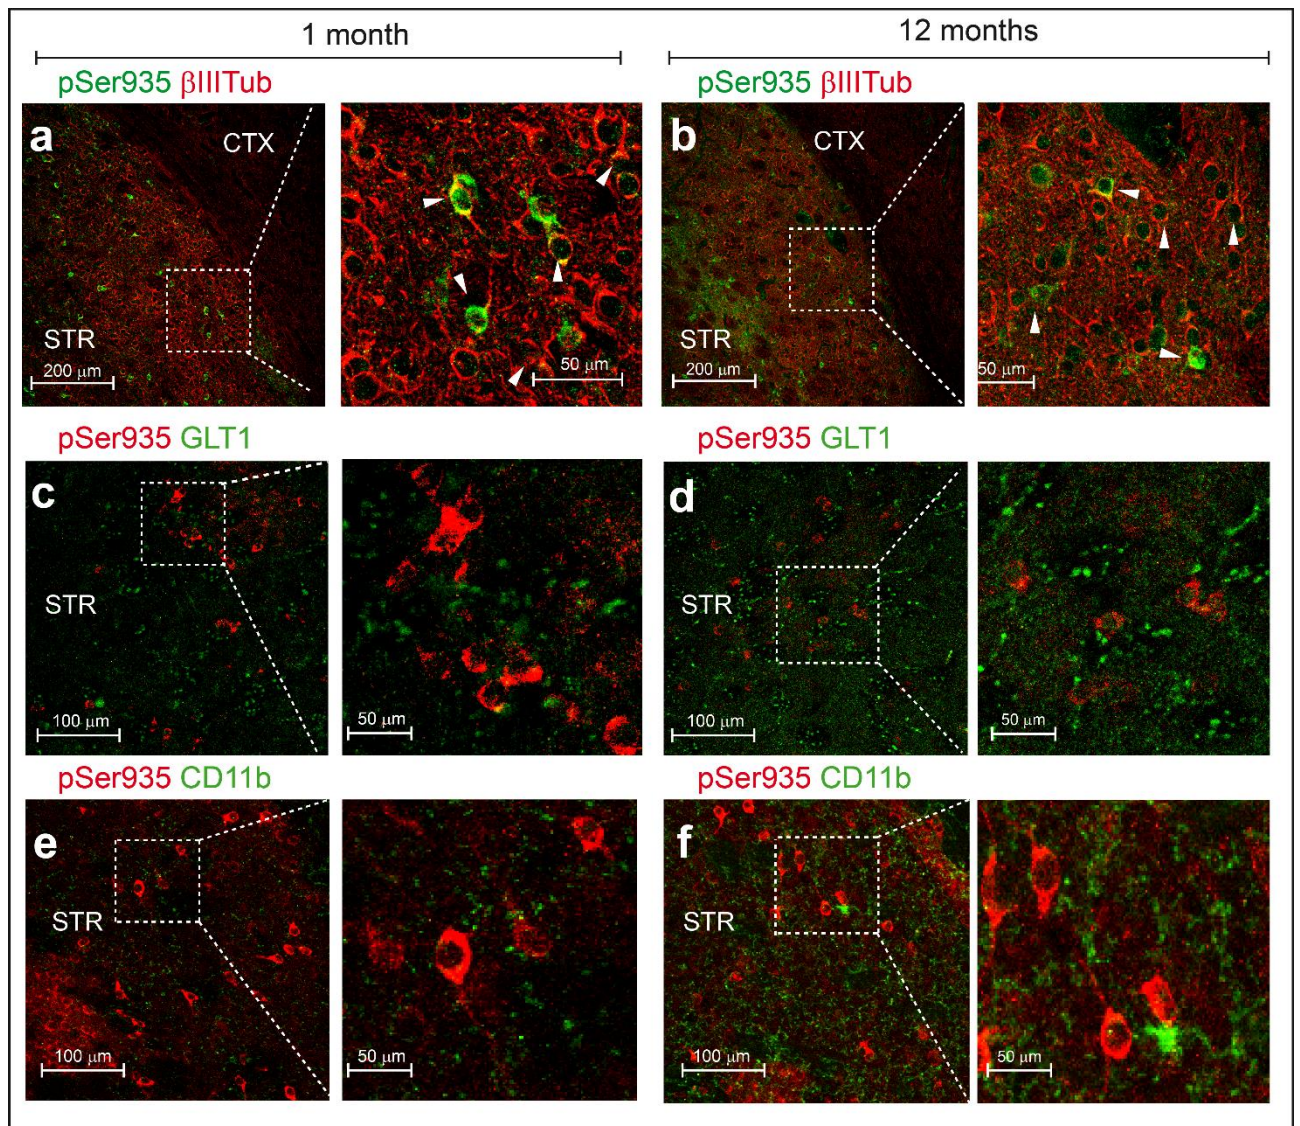

**Figure S3.** Immunofluorescent staining of brain slices from hemizygous transgenic mice overexpressing murine BAC-Lrrk2-G2019S mice. (a–f) Representative staining of brain slices from BAC-Lrrk2-G2019S mice with anti-phosphoSer935 of LRRK2 antibody showing co-localization only in  $\beta$ -III-tubulin-positive cells.

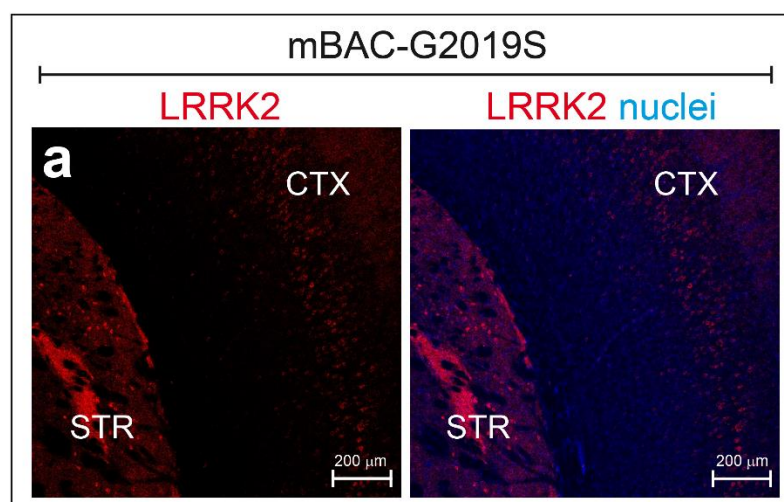

**Figure S4.** Immunofluorescent staining of brain slices from hemizygous transgenic mice overexpressing murine BAC-Lrrk2-G2019S mice. Representative staining of brain slice from BAC-



Lrrk2-G2019S mice with anti-LRRK2 MJFF2(c41-2) antibody showing the differential expression of Lrrk2 in the cortex.
